# Supplementary material
Source: ML conference proceedings conference paper supplement (https://openreview.net/forum?id=ol_xwLR2uWD)
Supplement: supplementary_material [file attachment]

The following document contains supplementary tables for ICLR submission #828 detailing network architectures, training hyperparameters, and numeric results of experiments discussed in the main document.

**Table 1.** Model Accuracy of MI Source Task

| Training Runs | $Std_A$ | $Ort_A$ | $RR_A^1$ | $Pre_A$ | $IRR_A$ | $RR_A$ | $Std_{AA}$ | $Ort_{AA}$ | $RR_{AA}^1$ | $Pre_{AA}$ | $IRR_{AA}$ | $RR_{AA}$ |
|---------------|---------|---------|----------|---------|---------|--------|------------|------------|-------------|------------|------------|-----------|
| 1             | 0.976   | 0.969   | 0.836    | 0.59    | 0.8350  | 0.772  | 0.978      | 0.968      | 0.885       | 0.638      | 0.9770     | 0.992     |
| 2             | 0.975   | 0.921   | 0.68     | 0.548   | 0.8360  | 0.784  | 0.983      | 0.926      | 0.918       | 0.402      | 0.9770     | 0.994     |
| 3             | 0.964   | 0.957   | 0.8      | 0.566   | 0.8140  | 0.725  | 0.963      | 0.958      | 0.993       | 0.397      | 0.9740     | 0.993     |
| 4             | 0.987   | 0.991   | 0.657    | 0.676   | 0.8420  | 0.771  | 0.989      | 0.993      | 0.917       | 0.404      | 0.9980     | 0.989     |
| 5             | 0.957   | 0.979   | 0.825    | 0.533   | 0.8400  | 0.774  | 0.954      | 0.979      | 0.944       | 0.527      | 0.9710     | 0.993     |
| Avg.          | 0.972   | 0.963   | 0.760    | 0.5826  | 0.8334  | 0.765  | 0.973      | 0.965      | 0.931       | 0.4736     | 0.9794     | 0.992     |
| Std. dev.     | 0.012   | 0.027   | 0.085    | 0.056   | 0.0112  | 0.023  | 0.015      | 0.025      | 0.040       | 0.1069     | 0.0107     | 0.002     |

**Table 2.** Model Accuracy of MI Transfer Task

| Training Runs | $Std_{AB}$ | $Ort_{AB}$ | $Std_B$ | $RR_{AB}^1$ | $Pre_{AB}$ | $IRR_{AB}$ | $RR_{AB}$ |
|---------------|------------|------------|---------|-------------|------------|------------|-----------|
| 1             | 0.136      | 0.984      | 0.852   | 0.919       | 0.656      | 0.998      | 0.998     |
| 2             | 0.136      | 0.136      | 0.991   | 0.954       | 0.594      | 0.991      | 0.997     |
| 3             | 0.989      | 0.957      | 0.953   | 0.977       | 0.443      | 0.978      | 0.995     |
| 4             | 0.136      | 0.991      | 0.909   | 0.963       | 0.597      | 0.989      | 0.997     |
| 5             | 0.96       | 0.977      | 0.965   | 0.963       | 0.517      | 0.969      | 1.000     |
| Avg.          | 0.471      | 0.809      | 0.934   | 0.955       | 0.5614     | 0.9850     | 0.997     |
| Std. dev.     | 0.459      | 0.376      | 0.055   | 0.022       | 0.0826     | 0.0115     | 0.002     |

**Table 3.** Model Accuracy of CIFAR Tests (Resnet 110 network)

| Training Runs | $Std_{c1}$ | $Ort_{c1}$ | $RR_{c1}$ | $Std_{c10}$ | $Ort_{c10}$ | $RR_{c10}$    | $Std_{c10}$ | $Ort_{c10}$ | $RR_{c10}$    |
|---------------|------------|------------|-----------|-------------|-------------|---------------|-------------|-------------|---------------|
|               | CIFAR 10   |            |           |             |             |               | CIFAR 10.1  |             |               |
| 1             | 0.9082     | 0.9042     | 0.9076    | 0.9194      | 0.9255      | 0.9277        | 0.8275      | 0.8375      | 0.8435        |
| 2             | 0.909      | 0.9081     | 0.9026    | 0.9228      | 0.9231      | 0.9267        | 0.8315      | 0.8315      | 0.846         |
| 3             | 0.908      | 0.9085     | 0.9028    | 0.92        | 0.9239      | 0.927         | 0.8305      | 0.8415      | 0.834         |
| 4             | 0.9031     | 0.9098     | 0.9052    | 0.9176      | 0.9257      | 0.928         | 0.8325      | 0.8395      | 0.8335        |
| 5             | 0.9104     | 0.9106     | 0.9108    | 0.9249      | 0.9259      | 0.9286        | 0.835       | 0.8435      | 0.8475        |
| Avg.          | 0.9077     | 0.9082     | 0.9058    | 0.9209      | 0.9248      | <b>0.9276</b> | 0.8314      | 0.8387      | <b>0.8409</b> |
| Std. dev.     | 0.0028     | 0.0025     | 0.0035    | 0.0029      | 0.0012      | 0.0008        | 0.0027      | 0.0046      | 0.0067        |

**Table 4.** Model  $L^2$  Loss of Smoke Tests. Results for  $B_2; 10^7$

| Training Runs | $Pre_{AB_1}$ | $Std_{AB_1}$ | $RR_{AB_1}$ | $Pre_{AB_2}$ | $Std_{AB_2}$ | $RR_{AB_2}$ |
|---------------|--------------|--------------|-------------|--------------|--------------|-------------|
| 1             | 1013         | 338.4        | 197.7       | 1.41         | 1.93         | 1.62        |
| 2             | 411.4        | 380.2        | 203.6       | 12.4         | 1.63         | 1.55        |
| 3             | 621.5        | 2096.2       | 206         | 3.74         | 2.40         | 1.56        |
| 4             | 526.5        | 214.3        | 203.1       | 11.5         | 1.52         | 1.54        |
| 5             | 358.5        | 219.9        | 200.8       | 9.19         | 1.49         | 1.51        |
| Avg.          | 586.18       | 649.8        | 202.24      | 7.63         | 1.80         | 1.56        |
| Std. dev.     | 259.50       | 811.82       | 3.14        | 4.83         | 0.382        | 0.0381      |

**Table 5.** Forward and Reverse Pass Neural Networks for MNIST and *peak* Tests

|                                                                                                                                                                                                                                                                                                                                                                                                                                                                                                                  |
|------------------------------------------------------------------------------------------------------------------------------------------------------------------------------------------------------------------------------------------------------------------------------------------------------------------------------------------------------------------------------------------------------------------------------------------------------------------------------------------------------------------|
| <p>Forward pass:<br/> <i>MNIST</i> (Fig. 1): <math>I(784) \rightarrow FC(10) + b_1 \rightarrow O(10)</math>. <i>peak</i> (Fig. 2 &amp; Fig.4 (a)): <math>I(784) \rightarrow FC(2) + b_1 \rightarrow O(2)</math>.<br/> <i>peak</i> (Fig. 4 (b)): <math>I(784) \rightarrow \text{relu}(\text{BN}(FC(2) + b_1)) \rightarrow O(2)</math>.<br/> <i>peak</i> (Fig. 4 (c)): <math>I(784) \rightarrow \text{relu}(\text{BN}(FC(128) + b_1)) \rightarrow \text{relu}(\text{BN}(FC(2) + b_2)) \rightarrow O(2)</math>.</p> |
| <p>Reverse pass:<br/> <i>MNIST</i> (Fig. 1): <math>I(10) - b_1 \rightarrow FC(784) \rightarrow O(784)</math> <i>peak</i> (Fig. 2 &amp; Fig.4 (a)): <math>I(10) - b_1 \rightarrow FC(784) \rightarrow O(784)</math><br/> <i>peak</i> (Fig. 4 (b)): <math>I(2) - b_1 \rightarrow FC(784) \rightarrow O(784)</math>.<br/> <i>peak</i> (Fig. 4 (c)): <math>I(2) - b_2 \rightarrow \text{relu}(\text{BN}(FC(128))) - b_1 \rightarrow FC(784) \rightarrow O(784)</math>.</p>                                           |

**Table 6.** Forward and Reverse Pass Neural Network for MI Tests

|                                                                                                                                                                                                                                                                                                                                                  |
|--------------------------------------------------------------------------------------------------------------------------------------------------------------------------------------------------------------------------------------------------------------------------------------------------------------------------------------------------|
| <p>Forward pass:<br/> <math>I(12) \rightarrow \tanh(FC(10) + b_1) = d_1 \rightarrow \tanh(FC(7) + b_2) = d_2 \rightarrow \tanh(FC(5) + b_3) = d_3</math><br/> <math>\rightarrow \tanh(FC(4) + b_4) = d_4 \rightarrow \tanh(FC(3) + b_5) = d_5 \rightarrow \tanh(FC(2) + b_6) = d_6 \rightarrow O(2)</math>.</p>                                  |
| <p>Reverse pass (<math>RR_A</math>):<br/> <math>I(2) - b_6 \rightarrow \tanh(FC(3)) - b_5 \rightarrow \tanh(FC(4)) - b_4 \rightarrow \tanh(FC(5)) - b_3 \rightarrow \tanh(FC(7)) - b_2</math><br/> <math>\rightarrow \tanh(FC(10)) - b_1 \rightarrow \tanh(FC(12)) \rightarrow O(12)</math>.</p>                                                 |
| <p>Reverse pass (<math>IRR_A</math>):<br/> <math>d_6 - b_6 \rightarrow \tanh(FC(3)) = d'_5, d_5 - b_5 \rightarrow \tanh(FC(4)) = d'_4, d_4 - b_4 \rightarrow \tanh(FC(5)) = d'_3,</math><br/> <math>d_3 - b_3 \rightarrow \tanh(FC(7)) = d'_2, d_2 - b_2 \rightarrow \tanh(FC(10)) = d'_1, d_1 - b_1 \rightarrow \tanh(FC(12)) = d'_0</math></p> |

**Table 7.** Hyperparameters of MI Tests

|                 |                                                                                                                                                                                                  |               |        |
|-----------------|--------------------------------------------------------------------------------------------------------------------------------------------------------------------------------------------------|---------------|--------|
| Batch Size      | 512                                                                                                                                                                                              | Learning Rate | 0.0004 |
| $\lambda$       | $RR_A: \lambda_{1 \sim 6} = 10^{-2}$<br>$IRR_A: \lambda_1 = 8 \times 10^{-2}, \lambda_2 = 6 \times 10^{-2}, \lambda_3 = 4 \times 10^{-2}, \lambda_4 = 2 \times 10^{-2}, \lambda_{1,2} = 10^{-2}$ |               |        |
| Training Epochs | 20000 for $Pte_{A/AA/AB}, RR_{A/AA/AB}, IRR_{A/AA/AB}, Std_{A/AA/AB}$ and $Std_B$                                                                                                                |               |        |

**Table 8.** Forward and Reverse Pass Neural Network for Digit Generation Tests

|                                                                                                                                                                                                                                                                     |
|---------------------------------------------------------------------------------------------------------------------------------------------------------------------------------------------------------------------------------------------------------------------|
| <p>Forward pass:<br/> <math>I(74) \rightarrow \text{relu}(\text{BN}(FC(1024))) \rightarrow \text{relu}(\text{BN}(FC(6272))) \rightarrow \text{relu}(\text{BN}(C(4,64,2))) \rightarrow \text{relu}(\text{BN}(C(4,1,2))) = I_r</math>.</p>                            |
| <p>Reverse pass (<math>RR_{A/AA/AB}</math>):<br/> <math>I_r \rightarrow \text{relu}(\text{BN}(D(4,64,2))) \rightarrow \text{relu}(\text{BN}(D(4,128,2))) \rightarrow \text{relu}(\text{BN}(FC(1024))) \rightarrow \text{relu}(FC(74)) \rightarrow O(74)</math>.</p> |

**Table 9.** Hyperparameters of Digit Generation Tests

|               |                            |                |                                                                            |
|---------------|----------------------------|----------------|----------------------------------------------------------------------------|
| Batch Size    | 256                        | $\lambda$      | $\lambda_{c_1} = 2 \times 10^{-3}; \lambda_{c_{2,3}} = 1.5 \times 10^{-3}$ |
| Learning Rate | 0.001 for $RR^1$ and $Std$ | Training Steps | 150000 steps for $RR^1$ and $Std$                                          |

**Table 10.** Forward and Reverse Pass Network for Texture-shape Tests

|                                                                                                                                                                                                                                                                                                                                                                  |
|------------------------------------------------------------------------------------------------------------------------------------------------------------------------------------------------------------------------------------------------------------------------------------------------------------------------------------------------------------------|
| <p>Forward pass:<br/> <math>I(224,224,3) \rightarrow \text{relu}(C(4,8,2) + b_1) \rightarrow \text{relu}(C(4,8,2) + b_2) \rightarrow \text{relu}(C(4,8,2) + b_3) \rightarrow \text{relu}(C(4,8,2) + b_4)</math><br/> <math>\rightarrow \text{relu}(C(4,8,2) + b_5) \rightarrow \text{relu}(C(4,8,1) + b_6) = I_r \rightarrow FC(16) \rightarrow O(16)</math></p> |
| <p>Reverse pass:<br/> <math>I_r - b_6 \rightarrow \text{relu}(D(4,8,1)) - b_5 \rightarrow \text{relu}(D(4,8,2)) - b_4 \rightarrow \text{relu}(D(4,8,2)) - b_3 \rightarrow \text{relu}(D(4,8,2)) - b_2</math><br/> <math>\rightarrow \text{relu}(D(4,8,2)) - b_1 \rightarrow \text{relu}(D(4,3,2)) \rightarrow O(224,224,3)</math></p>                            |

**Table 11.** Hyperparameters of Texture-shape Tests

|               |        |                      |                     |
|---------------|--------|----------------------|---------------------|
| Batch Size    | 64     | $\lambda_{1 \sim 6}$ | $5 \times 10^{-12}$ |
| Learning Rate | 0.0001 | Training Epochs      | 200                 |

**Table 12.** Forward and Reverse Pass Neural Network for CIFAR Tests (Resnet 110 network)

|                                                                                                                                                                                                                                                                                               |
|-----------------------------------------------------------------------------------------------------------------------------------------------------------------------------------------------------------------------------------------------------------------------------------------------|
| <p>Example residual block in forward pass:</p> $I(32,32,3) \rightarrow \dots \rightarrow BN,relu \rightarrow d_{min} \rightarrow C(3,64,1) \rightarrow d_{out} \rightarrow BN,relu \rightarrow d_{m+1,in} \rightarrow C(3,64,1) \rightarrow d_{m+1,out} \rightarrow \oplus \rightarrow \dots$ |
| <p>Example block in reverse pass:</p> $d_{m+1,out} \rightarrow D(3,64,1) \rightarrow d'_{m+1,in}, d_{out} \rightarrow D(3,64,1) \rightarrow d'_{min}, \dots$                                                                                                                                  |

**Table 13.** Hyperparameters of CIFAR Tests (Resnet 110 network)

| Batch Size    | 256                                                                                                                                                                                 | $\lambda$ | $10^{-8}$ | Training Epochs | 200 epochs |
|---------------|-------------------------------------------------------------------------------------------------------------------------------------------------------------------------------------|-----------|-----------|-----------------|------------|
| Learning Rate | $RR_{c1}, Ort_{c1}$ and $Std_{c1}$ : 0.01<br>$RR_{c10}, Ort_{c10}$ and $Std_{c10}$ : 0.01 (0-80 epochs), 0.001 (80-120 epochs)<br>0.0001 (120-160 epochs), 0.00001 (160-200 epochs) |           |           |                 |            |

**Table 14.** Forward and Reverse Pass Neural Network for Smoke Tests

|                                                                                                                                                                                                                                                                                                                      |
|----------------------------------------------------------------------------------------------------------------------------------------------------------------------------------------------------------------------------------------------------------------------------------------------------------------------|
| <p>Generator forward pass:</p> $I(16,16,1) \rightarrow relu(C(5,64,1) + b_1) \rightarrow UP \rightarrow relu(C(5,128,1) + b_2) \rightarrow UP \rightarrow relu(C(5,128,1) + b_3) \rightarrow relu(C(5,64,1) + b_4) \rightarrow relu(C(5,32,1) + b_5) \rightarrow relu(C(5,1,1) + b_6) \rightarrow O(64,64,1) = I_r.$ |
| <p>Generator reverse pass:</p> $I_r - b_6 \rightarrow relu(D(5,32,1)) - b_5 \rightarrow relu(D(5,64,1)) - b_4 \rightarrow relu(D(5,128,1)) - b_3 \rightarrow relu(D(5,128,1)) \rightarrow MP - b_2 \rightarrow relu(D(5,64,1)) \rightarrow MP - b_1 \rightarrow relu(D(5,1,1)) \rightarrow O(16,16,1).$              |
| <p>Discriminator:</p> $I(64,64,2) \rightarrow lrelu(BN(C(5,32,1) + b_1)) \rightarrow lrelu(BN(C(5,64,1) + b_2)) \rightarrow lrelu(BN(C(5,128,1) + b_3)) \rightarrow lrelu(BN(C(5,256,1) + b_4)) \rightarrow FC(1) + b_5 \rightarrow O(1).$                                                                           |

**Table 15.** Autoencoder Architecture for Smoke Tests

|                                                                                                                                                                                                                                                                                                                                                                                                                                                                                                                                                                                                            |
|------------------------------------------------------------------------------------------------------------------------------------------------------------------------------------------------------------------------------------------------------------------------------------------------------------------------------------------------------------------------------------------------------------------------------------------------------------------------------------------------------------------------------------------------------------------------------------------------------------|
| <p><math>Std_{AB_1}</math>:</p> $I(64,64,1) \rightarrow relu(C(5,32,1) + b_1) \rightarrow relu(C(5,64,1) + b_2) \rightarrow relu(C(5,128,1) + b_3) \rightarrow relu(C(5,128,1) + b_4) \rightarrow MP \rightarrow relu(C(5,64,1) + b_5) \rightarrow MP \rightarrow relu(C(5,1,1) + b_6) \rightarrow relu(C(5,64,1) + b_7) \rightarrow UP \rightarrow relu(C(5,128,1) + b_8) \rightarrow UP \rightarrow relu(C(5,128,1) + b_9) \rightarrow relu(C(5,64,1) + b_{10}) \rightarrow relu(C(5,32,1) + b_{11}) \rightarrow relu(C(5,1,1) + b_{12}) \rightarrow O(64,64,1).$                                        |
| <p><math>Pre_{AB_1}</math>:</p> $I(64,64,1) \rightarrow relu(C(5,64,1) + b_1) \rightarrow MP \rightarrow relu(C(5,128,1) + b_2) \rightarrow MP \rightarrow relu(C(5,128,1) + b_3) \rightarrow relu(C(5,64,1) + b_4) \rightarrow relu(C(5,32,1) + b_5) \rightarrow relu(C(5,1,1) + b_6) \rightarrow relu(D(5,32,1) + b_7) \rightarrow relu(C(5,64,1) + b_8) \rightarrow relu(C(5,128,1) + b_9) \rightarrow relu(C(5,128,1) + b_{10}) \rightarrow UP \rightarrow relu(C(5,64,1) + b_{11}) \rightarrow UP \rightarrow relu(C(5,1,1) + b_{12}) \rightarrow O(64,64,1).$                                        |
| <p><math>RR_{AB_1}</math>:</p> $I(64,64,1) - b_1 \rightarrow relu(D(5,32,1)) - b_2 \rightarrow relu(D(5,64,1)) - b_3 \rightarrow relu(D(5,128,1)) - b_4 \rightarrow relu(D(5,128,1)) \rightarrow MP - b_5 \rightarrow relu(D(5,64,1)) \rightarrow MP - b_6 \rightarrow relu(D(5,1,1)) \rightarrow relu(C(5,64,1) + b_7) \rightarrow UP \rightarrow relu(C(5,128,1) + b_8) \rightarrow UP \rightarrow relu(C(5,128,1) + b_9) \rightarrow relu(C(5,64,1) + b_{10}) \rightarrow relu(C(5,32,1) + b_{11}) \rightarrow relu(C(5,1,1) + b_{12}) \rightarrow O(64,64,1).$                                         |
| <p><math>Pre_{AB_2}, Std_{AB_2}</math> and <math>RR_{AB_2}</math>:</p> $I(64,64,3) \rightarrow relu(C(5,32,1) + b_1) \rightarrow relu(C(5,64,1) + b_2) \rightarrow relu(C(5,128,1) + b_3) \rightarrow relu(C(5,128,1) + b_4) \rightarrow MP \rightarrow relu(C(5,64,1) + b_5) \rightarrow MP \rightarrow relu(C(5,1,1) + b_6) \rightarrow relu(C(5,64,1) + b_7) \rightarrow UP \rightarrow relu(C(5,128,1) + b_8) \rightarrow UP \rightarrow relu(C(5,128,1) + b_9) \rightarrow relu(C(5,64,1) + b_{10}) \rightarrow relu(C(5,32,1) + b_{11}) \rightarrow relu(C(5,3,1) + b_{12}) \rightarrow O(64,64,3).$ |

**Table 16.** Hyperparameters of Smoke Tests

| Batch Size      | 64                                                                                                                              | Learning Rate | 0.0002 | $\lambda$ | $\lambda_1 = 10; \lambda_{2-6} = 0.1$ |
|-----------------|---------------------------------------------------------------------------------------------------------------------------------|---------------|--------|-----------|---------------------------------------|
| Training Epochs | 40000 for $Pre_A, RR_A$ and $Std_A$ ;<br>1000 for $Pre_{AB_1}, Pre_{AB_2}, RR_{AB_1}, RR_{AB_2}, Std_{AB_1}$ and $Std_{AB_2}$ . |               |        |           |                                       |

Table 17.  $I(X; \mathcal{D}_m)$  and  $I(\mathcal{D}_m; Y)$  Values of All MI Models

|             | Results of 5 runs | $I(X; \mathcal{D}_2)$ | $I(X; \mathcal{D}_3)$ | $I(X; \mathcal{D}_4)$ | $I(X; \mathcal{D}_5)$ | $I(X; \mathcal{D}_6)$ | $I(X; \mathcal{D}_7)$ | $I(\mathcal{D}_2; Y)$ | $I(\mathcal{D}_3; Y)$ | $I(\mathcal{D}_4; Y)$ | $I(\mathcal{D}_5; Y)$ | $I(\mathcal{D}_6; Y)$ | $I(\mathcal{D}_7; Y)$ |
|-------------|-------------------|-----------------------|-----------------------|-----------------------|-----------------------|-----------------------|-----------------------|-----------------------|-----------------------|-----------------------|-----------------------|-----------------------|-----------------------|
| $Std_A$     | Avg.              | 11.9992               | 11.9879               | 11.7279               | 7.9088                | 2.9612                | 1.2367                | 0.9992                | 0.9992                | 0.9973                | 0.9947                | 0.9786                | 0.9554                |
|             | Std. dev.         | 0.0011                | 0.0138                | 0.2007                | 1.5376                | 0.8695                | 0.0973                | 0.0000                | 0.0000                | 0.0012                | 0.0031                | 0.0112                | 0.0233                |
| $Pre_A$     | Avg.              | 11.6338               | 11.5846               | 11.5518               | 11.4495               | 10.8126               | 4.4459                | 0.9468                | 0.9371                | 0.9289                | 0.9037                | 0.6987                | 0.0188                |
|             | Std. dev.         | 0.2079                | 0.1342                | 0.1192                | 0.0732                | 0.2083                | 0.4858                | 0.0295                | 0.0149                | 0.0108                | 0.0140                | 0.0732                | 0.0122                |
| $RR_A^1$    | Avg.              | 11.5487               | 10.3822               | 8.8948                | 7.8285                | 6.1742                | 3.9528                | 0.9564                | 0.8418                | 0.7463                | 0.6921                | 0.5969                | 0.4937                |
|             | Std. dev.         | 0.9988                | 1.1225                | 0.5715                | 0.7409                | 0.7583                | 0.2322                | 0.0940                | 0.0785                | 0.0440                | 0.0131                | 0.0652                | 0.0736                |
| $IRR_A$     | Avg.              | 11.5521               | 6.7737                | 4.0047                | 4.0087                | 3.8456                | 3.7120                | 0.9388                | 0.6372                | 0.6013                | 0.6002                | 0.6008                | 0.5997                |
|             | Std. dev.         | 0.0558                | 2.3736                | 0.1872                | 0.2787                | 0.2033                | 0.0909                | 0.0070                | 0.0334                | 0.0244                | 0.0233                | 0.0231                | 0.0236                |
| $RR_A$      | Avg.              | 5.2845                | 4.8838                | 4.2668                | 3.9356                | 4.7603                | 4.6238                | 0.5654                | 0.5369                | 0.5358                | 0.5182                | 0.5261                | 0.5336                |
|             | Std. dev.         | 0.4545                | 0.1569                | 0.3115                | 0.1279                | 0.0783                | 0.0173                | 0.0337                | 0.0039                | 0.0111                | 0.0060                | 0.0115                | 0.0031                |
| $Ort_A$     | Avg.              | 11.9976               | 11.9702               | 11.4784               | 7.7023                | 2.6314                | 1.0755                | 0.9992                | 0.9992                | 0.9955                | 0.9849                | 0.9681                | 0.9493                |
|             | Std. dev.         | 0.0051                | 0.0505                | 0.5529                | 0.8500                | 0.4071                | 0.0629                | 0.0000                | 0.0000                | 0.0054                | 0.0128                | 0.0254                | 0.0325                |
| $Std_{AA}$  | Avg.              | 11.9984               | 11.9770               | 11.7029               | 7.3237                | 2.6905                | 1.2204                | 0.9992                | 0.9990                | 0.9973                | 0.9932                | 0.9752                | 0.9583                |
|             | Std. dev.         | 0.0021                | 0.0292                | 0.2305                | 1.2948                | 0.3707                | 0.1700                | 0.0000                | 0.0004                | 0.0009                | 0.0080                | 0.0169                | 0.0242                |
| $Pre_{AA}$  | Avg.              | 8.5178                | 6.7796                | 5.8199                | 4.9982                | 4.6117                | 3.8572                | 0.6125                | 0.4349                | 0.3312                | 0.2596                | 0.2187                | 0.1649                |
|             | Std. dev.         | 1.2999                | 0.8952                | 0.4626                | 0.3502                | 0.2979                | 0.3172                | 0.1350                | 0.1015                | 0.0423                | 0.0346                | 0.0272                | 0.0310                |
| $RR_{AA}^1$ | Avg.              | 11.9989               | 11.8699               | 11.0450               | 9.0914                | 3.9232                | 1.3239                | 0.9992                | 0.9934                | 0.9813                | 0.9778                | 0.9404                | 0.9054                |
|             | Std. dev.         | 0.0016                | 0.2075                | 0.9404                | 1.8047                | 1.3972                | 0.4193                | 0.0000                | 0.0118                | 0.0217                | 0.0374                | 0.0420                | 0.0528                |
| $IRR_{AA}$  | Avg.              | 11.9527               | 10.2473               | 8.1597                | 6.7212                | 2.4402                | 1.1113                | 0.9992                | 0.9743                | 0.9662                | 0.9917                | 0.9859                | 0.9706                |
|             | Std. dev.         | 0.0472                | 1.6567                | 2.3965                | 1.8774                | 0.4665                | 0.0512                | 0.0000                | 0.0227                | 0.0124                | 0.0047                | 0.0110                | 0.0197                |
| $RR_{AA}$   | Avg.              | 11.9200               | 11.5621               | 10.6095               | 7.7398                | 2.2372                | 1.0416                | 0.9992                | 0.9988                | 0.9985                | 0.9975                | 0.9906                | 0.9875                |
|             | Std. dev.         | 0.0540                | 0.1463                | 0.5465                | 0.8093                | 1.0104                | 0.0505                | 0.0000                | 0.0005                | 0.0007                | 0.0024                | 0.0073                | 0.0046                |
| $Ort_{AA}$  | Avg.              | 11.9970               | 11.9727               | 11.3343               | 6.1690                | 1.9642                | 1.0985                | 0.9992                | 0.9991                | 0.9971                | 0.9832                | 0.9625                | 0.9477                |
|             | Std. dev.         | 0.0061                | 0.0504                | 0.6796                | 1.2529                | 0.5865                | 0.0891                | 0.0000                | 0.0002                | 0.0032                | 0.0166                | 0.0269                | 0.0320                |
| $Std_{AB}$  | Avg.              | 11.9989               | 11.9794               | 10.2985               | 3.0652                | 1.2677                | 0.5283                | 0.9992                | 0.9988                | 0.9029                | 0.4041                | 0.3923                | 0.3860                |
|             | Std. dev.         | 0.0019                | 0.0116                | 1.5095                | 4.0345                | 1.8717                | 0.7445                | 0.0000                | 0.0006                | 0.0918                | 0.5359                | 0.5329                | 0.5288                |
| $Pre_{AB}$  | Avg.              | 8.1364                | 6.0174                | 5.6115                | 4.9866                | 4.5760                | 3.7471                | 0.5445                | 0.2819                | 0.2525                | 0.2119                | 0.1885                | 0.1429                |
|             | Std. dev.         | 1.2778                | 0.5196                | 0.3912                | 0.2972                | 0.2805                | 0.2942                | 0.1498                | 0.0481                | 0.0276                | 0.0165                | 0.0158                | 0.0133                |
| $RR_{AB}^1$ | Avg.              | 11.9895               | 11.7982               | 9.7800                | 7.4955                | 3.2139                | 1.3122                | 0.9992                | 0.9901                | 0.9644                | 0.9661                | 0.9472                | 0.9308                |
|             | Std. dev.         | 0.0075                | 0.1710                | 1.0207                | 1.4405                | 1.2750                | 0.1537                | 0.0000                | 0.0131                | 0.0310                | 0.0357                | 0.0349                | 0.0344                |
| $IRR_{AB}$  | Avg.              | 11.9047               | 10.8970               | 8.3860                | 5.4257                | 1.7110                | 1.0694                | 0.9989                | 0.9915                | 0.9813                | 0.9929                | 0.9812                | 0.9735                |
|             | Std. dev.         | 0.0890                | 0.8474                | 1.9089                | 1.1511                | 0.4913                | 0.0529                | 0.0006                | 0.0089                | 0.0145                | 0.0085                | 0.0209                | 0.0235                |
| $RR_{AB}$   | Avg.              | 11.9093               | 11.5761               | 9.4227                | 5.6190                | 2.2286                | 1.0100                | 0.9992                | 0.9992                | 0.9984                | 0.9989                | 0.9962                | 0.9935                |
|             | Std. dev.         | 0.0957                | 0.1450                | 1.7109                | 1.4609                | 0.4611                | 0.0091                | 0.0000                | 0.0000                | 0.0014                | 0.0004                | 0.0032                | 0.0035                |
| $Ort_{AB}$  | Avg.              | 11.9946               | 11.9546               | 8.9865                | 3.2802                | 1.4296                | 0.8571                | 0.9992                | 0.9985                | 0.8048                | 0.7851                | 0.7756                | 0.7675                |
|             | Std. dev.         | 0.0104                | 0.0561                | 3.3571                | 2.7102                | 0.9848                | 0.4858                | 0.0000                | 0.0007                | 0.4279                | 0.4391                | 0.4342                | 0.4296                |
| $Std_B$     | Avg.              | 12.0000               | 11.9913               | 11.7602               | 8.6184                | 3.2490                | 1.3171                | 0.9992                | 0.9990                | 0.9975                | 0.9880                | 0.9458                | 0.9160                |
|             | Std. dev.         | 0.0000                | 0.0113                | 0.3400                | 2.0542                | 1.2740                | 0.2025                | 0.0000                | 0.0003                | 0.0007                | 0.0114                | 0.0476                | 0.0565                |

**Table 18.** Per Category Accuracy of  $RR_{TS}$  for Texture-shape Tests

| Data Sets |           | stylized data |        |         |        |        |        |        |        |        |        |        |          |          |        |        |        | edge data |        | filled data |
|-----------|-----------|---------------|--------|---------|--------|--------|--------|--------|--------|--------|--------|--------|----------|----------|--------|--------|--------|-----------|--------|-------------|
| Model     | Runs      | airplane      | bear   | bicycle | bird   | boat   | bottle | car    | cat    | chair  | clock  | dog    | elephant | keyboard | knife  | oven   | truck  | Acc.      | Acc.   | Acc.        |
| $RR_{TS}$ | 0         | 0.9           | 0      | 0.7     | 0.6    | 0      | 0.9    | 0.6    | 0.8    | 0.2    | 0.7    | 0      | 1        | 0.6      | 0.5    | 0      | 0.8    | 0.5214    | 0.3063 | 0.4500      |
|           | 1         | 0.9           | 0.6    | 0       | 0.4    | 0.7    | 1      | 0      | 0.9    | 0.5    | 0      | 0.4    | 0        | 0.7      | 0.5    | 0.9    | 1      | 0.5145    | 0.2813 | 0.4375      |
|           | 2         | 1             | 0.9    | 1       | 0.6    | 0.8    | 0      | 0.7    | 0      | 0.7    | 0.9    | 0.5    | 0.8      | 0        | 0      | 1      | 0.9    | 0.6043    | 0.1938 | 0.4500      |
|           | 3         | 0             | 0.8    | 1       | 0.9    | 0.5    | 0      | 1      | 0      | 0      | 0      | 0.3    | 0        | 0.9      | 0.7    | 0.9    | 0      | 0.4402    | 0.2125 | 0.3313      |
|           | 4         | 0.8           | 0.9    | 0       | 0.7    | 0.5    | 1      | 0      | 0.5    | 0      | 0.9    | 0      | 1        | 0.4      | 0.7    | 0.8    | 1      | 0.5746    | 0.2125 | 0.3625      |
|           | 5         | 0.9           | 0.7    | 0.8     | 0      | 0      | 1      | 1      | 0      | 1      | 0.8    | 0.6    | 0        | 1        | 0.9    | 0.8    | 1      | 0.6471    | 0.2500 | 0.4563      |
|           | 6         | 0.9           | 0.9    | 0.9     | 0.9    | 0.4    | 0.9    | 0.8    | 0.4    | 0.6    | 0.8    | 0.3    | 0        | 0        | 0      | 1      | 0.5465 | 0.2563    | 0.4375 |             |
|           | 7         | 1             | 0.9    | 0.9     | 0.7    | 0.6    | 0      | 0.3    | 0.7    | 0      | 0.9    | 0.6    | 0.4      | 0        | 0.8    | 0.8    | 1      | 0.5897    | 0.2813 | 0.4313      |
|           | 8         | 0.8           | 0.6    | 0       | 0.5    | 0.5    | 0      | 0.6    | 0.8    | 0      | 0.8    | 0.3    | 0        | 0.6      | 0.8    | 0.7    | 0.8    | 0.4850    | 0.1813 | 0.3563      |
|           | 9         | 0.7           | 0.8    | 0       | 0.8    | 0      | 1      | 0      | 0.9    | 0      | 0.9    | 0.5    | 1        | 0.9      | 0.7    | 0.7    | 0      | 0.5440    | 0.1938 | 0.3625      |
|           | Avg.      | 0.79          | 0.71   | 0.52    | 0.61   | 0.4    | 0.58   | 0.5    | 0.5    | 0.3    | 0.67   | 0.35   | 0.42     | 0.51     | 0.56   | 0.66   | 0.75   | 0.5467    | 0.2369 | 0.4075      |
|           | Std. dev. | 0.2923        | 0.2767 | 0.4566  | 0.2685 | 0.2981 | 0.5007 | 0.4000 | 0.3801 | 0.3712 | 0.3592 | 0.2173 | 0.4756   | 0.3929   | 0.3204 | 0.3596 | 0.4035 | 0.0604    | 0.0438 | 0.0481      |

**Table 19.** Per Category Accuracy of  $Ort_{TS}$  for Texture-shape Tests

| Data Sets  |           | stylized data |        |         |        |        |        |        |        |        |        |        |          |          |        |        |        | edge data |        | filled data |
|------------|-----------|---------------|--------|---------|--------|--------|--------|--------|--------|--------|--------|--------|----------|----------|--------|--------|--------|-----------|--------|-------------|
| Model      | Runs      | airplane      | bear   | bicycle | bird   | boat   | bottle | car    | cat    | chair  | clock  | dog    | elephant | keyboard | knife  | oven   | truck  | Acc.      | Acc.   | Acc.        |
| $Ort_{TS}$ | 0         | 0.7           | 0      | 0.8     | 0.3    | 0      | 1      | 0.7    | 0.8    | 0.5    | 0      | 0.4    | 0.5      | 0.7      | 0.5    | 0      | 0      | 0.4987    | 0.1688 | 0.4188      |
|            | 1         | 0.6           | 0.3    | 0.6     | 0.1    | 0.4    | 1      | 0.4    | 0.5    | 0.5    | 1      | 0.4    | 0.1      | 0.6      | 0      | 0.6    | 0.8    | 0.4877    | 0.2688 | 0.3313      |
|            | 2         | 0.7           | 0.4    | 0.7     | 0.1    | 0.8    | 0      | 0.8    | 0      | 0      | 0.6    | 0      | 0.6      | 0        | 0.5    | 0.6    | 1      | 0.42      | 0.0875 | 0.3313      |
|            | 3         | 1             | 0.9    | 0.4     | 0.2    | 0.7    | 1      | 0      | 0.3    | 0.8    | 0.7    | 0.2    | 0.4      | 0.7      | 0      | 0.6    | 1      | 0.543     | 0.2188 | 0.4         |
|            | 4         | 0             | 0.2    | 0       | 0.7    | 0.9    | 1      | 0.9    | 0.6    | 1      | 0      | 0      | 0.3      | 0.8      | 0.4    | 0.7    | 1      | 0.521     | 0.1813 | 0.3688      |
|            | 5         | 0.5           | 0.2    | 0.7     | 0.4    | 0.1    | 0.9    | 0.3    | 0.4    | 0      | 0.4    | 0.1    | 0.2      | 0.3      | 0.5    | 0.6    | 0.6    | 0.3864    | 0.3438 | 0.3375      |
|            | 6         | 0.9           | 0      | 0.9     | 0.5    | 0      | 1      | 0.9    | 0.3    | 0      | 0.7    | 0.4    | 0        | 0        | 0.9    | 0      | 1      | 0.4683    | 0.1375 | 0.3938      |
|            | 7         | 0             | 0      | 0.9     | 0      | 0.6    | 0      | 0.4    | 0.7    | 0.9    | 0      | 0.3    | 0        | 0.8      | 0      | 0.8    | 1      | 0.3952    | 0.2375 | 0.3313      |
|            | 8         | 0             | 0.7    | 0.9     | 0.7    | 0.7    | 1      | 0      | 0.6    | 0      | 0.9    | 0.7    | 0        | 0.8      | 0.6    | 0.8    | 0      | 0.525     | 0.2438 | 0.3813      |
|            | 9         | 0.6           | 0.8    | 0.9     | 0.4    | 0.2    | 1      | 0.6    | 0      | 0.7    | 0      | 0.6    | 0        | 0.7      | 0.7    | 0      | 0      | 0.4554    | 0.1438 | 0.4250      |
|            | Avg.      | 0.5           | 0.35   | 0.68    | 0.34   | 0.44   | 0.79   | 0.5    | 0.42   | 0.44   | 0.43   | 0.31   | 0.21     | 0.54     | 0.41   | 0.56   | 0.64   | 0.47007   | 0.2031 | 0.3719      |
|            | Std. dev. | 0.3742        | 0.3408 | 0.2898  | 0.2459 | 0.3438 | 0.4175 | 0.3367 | 0.2741 | 0.4088 | 0.4029 | 0.2378 | 0.2283   | 0.3204   | 0.3143 | 0.3134 | 0.4600 | 0.0552    | 0.0746 | 0.0373      |

**Table 20.** Per Category Accuracy of  $Std_{TS}$  for Texture-shape Tests

| Data Sets  |           | stylized data |        |         |        |        |        |        |        |        |        |        |          |          |        |        |        | edge data |        | filled data |
|------------|-----------|---------------|--------|---------|--------|--------|--------|--------|--------|--------|--------|--------|----------|----------|--------|--------|--------|-----------|--------|-------------|
| Model      | Runs      | airplane      | bear   | bicycle | bird   | boat   | bottle | car    | cat    | chair  | clock  | dog    | elephant | keyboard | knife  | oven   | truck  | Acc.      | Acc.   | Acc.        |
| $Std_{TS}$ | 0         | 0.8           | 0.4    | 0       | 0.8    | 0.6    | 1      | 0.9    | 0.3    | 0.3    | 0      | 0.8    | 0        | 0        | 0      | 0      | 0      | 0.3700    | 0.1250 | 0.325       |
|            | 1         | 0.9           | 0.1    | 0.7     | 0.5    | 0.7    | 0.9    | 0.3    | 0.1    | 0.5    | 0.9    | 0.6    | 0.7      | 0        | 0      | 0.8    | 0.8    | 0.5228    | 0.1688 | 0.3875      |
|            | 2         | 0             | 0      | 0.8     | 0.8    | 0      | 0      | 0.6    | 0      | 0.4    | 0.9    | 0      | 0.7      | 0.8      | 0      | 0      | 0      | 0.3679    | 0.1625 | 0.2625      |
|            | 3         | 0             | 0.2    | 1       | 0.2    | 0.1    | 0      | 0      | 0.8    | 0      | 0.9    | 0.4    | 0        | 0.9      | 0.4    | 0.9    | 1      | 0.4216    | 0.1438 | 0.2688      |
|            | 4         | 0.8           | 0      | 0       | 0      | 0.1    | 1      | 0.7    | 0      | 0      | 0      | 0.1    | 0.9      | 0.7      | 0.7    | 0.4    | 0      | 0.3460    | 0.1438 | 0.2813      |
|            | 5         | 0.6           | 0.6    | 0       | 0.7    | 0      | 0      | 0      | 0.8    | 0.8    | 0.9    | 0.2    | 0        | 0.8      | 0.7    | 0.8    | 1      | 0.4937    | 0.1813 | 0.3438      |
|            | 6         | 0.8           | 0.4    | 0.6     | 0.5    | 0.7    | 0      | 0.8    | 0.8    | 0.6    | 1      | 0.8    | 0        | 0.6      | 0      | 0.3    | 0.8    | 0.5409    | 0.1250 | 0.3750      |
|            | 7         | 0             | 0      | 0.8     | 0.6    | 0      | 1      | 0      | 0      | 0.7    | 0.9    | 0.5    | 0        | 0.9      | 0      | 0.7    | 0      | 0.3812    | 0.1750 | 0.3375      |
|            | 8         | 0.5           | 0.8    | 0.6     | 0.4    | 0.6    | 0.6    | 0      | 0.4    | 0.3    | 0.7    | 0.3    | 0.7      | 0.5      | 0.3    | 0.9    | 0      | 0.5313    | 0.2313 | 0.4438      |
|            | 9         | 0.7           | 0      | 0       | 0.7    | 0.4    | 0      | 0.7    | 0.6    | 0.5    | 0.9    | 0.3    | 0.9      | 0        | 0      | 0.6    | 0.8    | 0.4442    | 0.1188 | 0.2813      |
|            | Avg.      | 0.61          | 0.25   | 0.37    | 0.52   | 0.4    | 0.45   | 0.5    | 0.38   | 0.41   | 0.71   | 0.4    | 0.39     | 0.52     | 0.21   | 0.54   | 0.44   | 0.4420    | 0.1575 | 0.3306      |
|            | Std. dev. | 0.3510        | 0.2877 | 0.4057  | 0.2616 | 0.3197 | 0.4882 | 0.3916 | 0.3490 | 0.2685 | 0.3814 | 0.2749 | 0.4175   | 0.3795   | 0.2961 | 0.3471 | 0.4695 | 0.0753    | 0.0341 | 0.0593      |

**Table 21.** Per Category Accuracy of  $Pre_{TS}$  for Texture-shape Tests

| Data Sets  |           | stylized data |        |         |        |        |        |        |        |        |        |        |          |          |        |        |        | edge data |        | filled data |
|------------|-----------|---------------|--------|---------|--------|--------|--------|--------|--------|--------|--------|--------|----------|----------|--------|--------|--------|-----------|--------|-------------|
| Model      | Runs      | airplane      | bear   | bicycle | bird   | boat   | bottle | car    | cat    | chair  | clock  | dog    | elephant | keyboard | knife  | oven   | truck  | Acc.      | Acc.   | Acc.        |
| $Pre_{TS}$ | 0         | 0             | 0      | 0       | 0      | 1      | 0      | 0      | 0      | 0      | 0      | 0      | 0        | 0        | 0      | 0      | 0      | 0.0625    | 0.0625 | 0.0875      |
|            | 1         | 0             | 0      | 0       | 0      | 0      | 0      | 0      | 1      | 0      | 0      | 0      | 0        | 0        | 0      | 0      | 0      | 0.0625    | 0.0625 | 0.075       |
|            | 2         | 0             | 0      | 0       | 0      | 0      | 1      | 0      | 0      | 0      | 0      | 0      | 0        | 0        | 0      | 0      | 0      | 0.0625    | 0.0625 | 0.06875     |
|            | 3         | 0             | 0      | 0       | 0      | 0      | 0      | 0      | 1      | 0      | 0      | 0      | 0        | 0        | 0      | 0      | 0      | 0.0625    | 0.0625 | 0.03125     |
|            | 4         | 0             | 0.8    | 0       | 0      | 0      | 0      | 0      | 0      | 0      | 0      | 0      | 0        | 0        | 0      | 0.6    | 0      | 0.0875    | 0.0625 | 0.06875     |
|            | 5         | 0             | 0      | 0       | 0      | 0      | 0      | 1      | 0      | 0      | 0      | 0      | 0        | 0        | 0      | 0      | 0      | 0.0625    | 0.0625 | 0.0625      |
|            | 6         | 1             | 0      | 0       | 0      | 0      | 0      | 0.1    | 0.2    | 0      | 0      | 0      | 0        | 0        | 0      | 0      | 0      | 0.08125   | 0.0625 | 0.1125      |
|            | 7         | 1             | 0      | 0       | 0      | 0      | 0      | 0      | 0      | 0      | 0      | 0      | 0        | 0        | 0      | 0      | 0      | 0.0625    | 0.0625 | 0.0875      |
|            | 8         | 0             | 0      | 0       | 0      | 1      | 0      | 0      | 0.1    | 0      | 0      | 0      | 0        | 0        | 0      | 0      | 0      | 0.06875   | 0.0625 | 0.08125     |
|            | 9         | 0             | 0      | 0       | 1      | 0      | 0      | 0      | 0      | 0      | 0      | 0      | 0        | 0        | 0      | 0      | 0      | 0.0625    | 0.0625 | 0.0625      |
|            | Avg.      | 0.2           | 0.08   | 0       | 0.2    | 0.1    | 0.1    | 0.12   | 0.22   | 0      | 0      | 0      | 0        | 0        | 0      | 0.06   | 0      | 0.0675    | 0.0625 | 0.07375     |
|            | Std. dev. | 0.4216        | 0.2530 | 0.0000  | 0.4216 | 0.3162 | 0.3162 | 0.3120 | 0.4158 | 0.0000 | 0.0000 | 0.0000 | 0.0000   | 0.0000   | 0.0000 | 0.1897 | 0.0000 | 0.0092    | 0.0000 | 0.0212      |

**Table 22.** Performance Comparison of Texture-shape Models

| Models              | Parameters | Cost (s/epoch) | Acc.  |
|---------------------|------------|----------------|-------|
| $Std_{TS}$          | 11840      | 0.387          | 0.442 |
| $Ort_{TS}$          | 11840      | 0.407          | 0.470 |
| $RR_{TS}$           | 11840      | 0.627          | 0.547 |
| $RR_{TS} - reduced$ | 8044       | 0.552          | 0.483 |
